# Supplementary material
Source: Springer Nature journal article supplement (https://www.springermedizin.de/resource/supplementary/12958_2013_1159_MOESM3_ESM.pdf/9566674)

Panel A

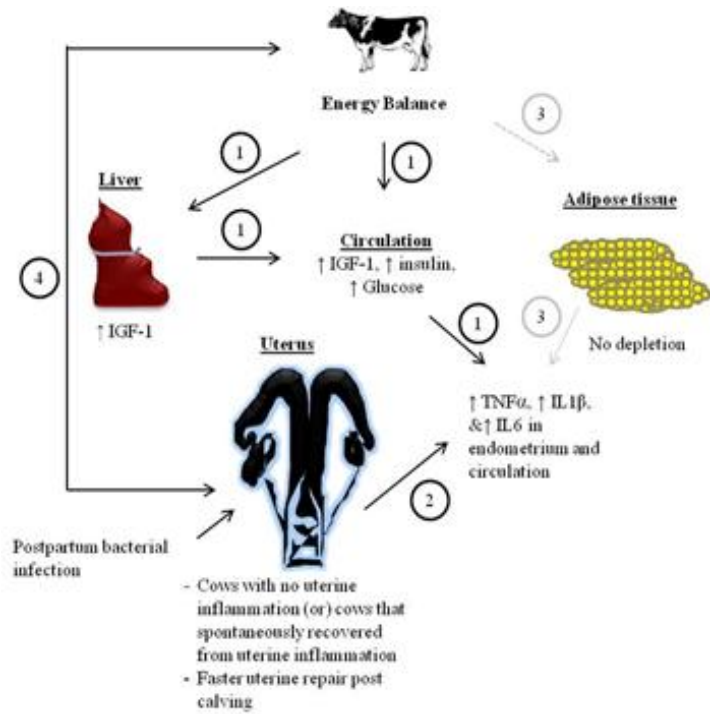

Panel B

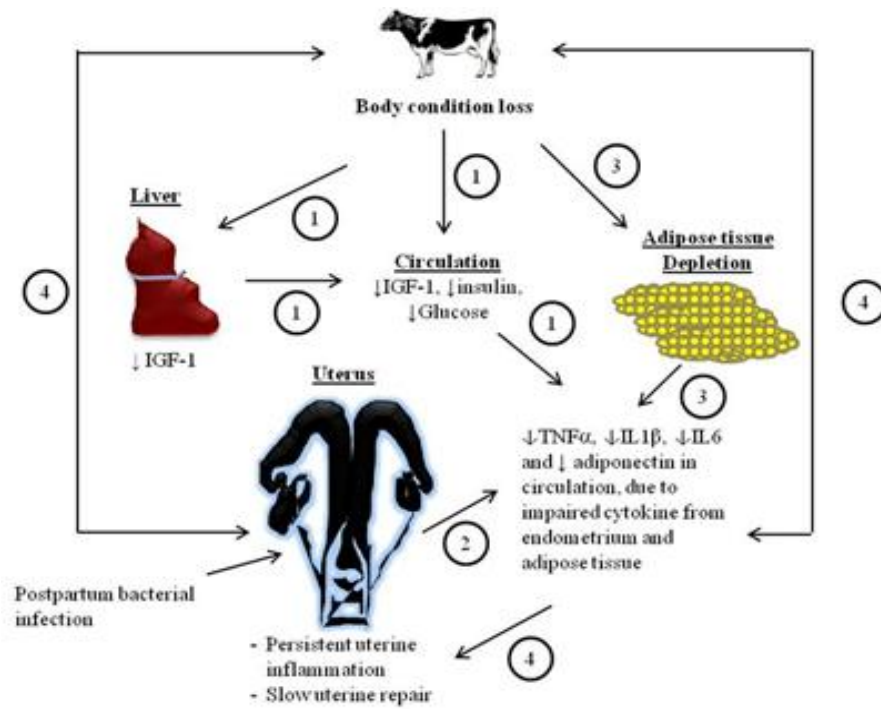

Supplement: MOESM3 [file 9566674]
